# Supplementary material for: Myosin heavy chain-embryonic regulates skeletal muscle differentiation during mammalian development
Source: Oxford University Press journal article supplement (doi:10.1242/dev.184507), 2020-02-24
Supplement: dev184507supp.pdf [file dev184507supp.pdf]

## Supplementary Data

Figure S1

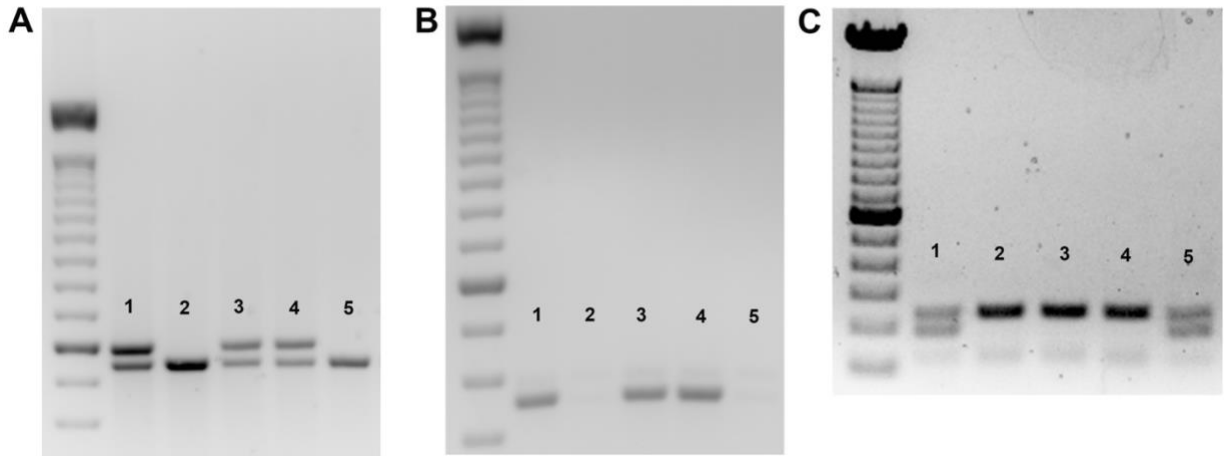

**Fig. S1: Verification of *Myh3* targeting and deletion.** (A) 5' LoxP targeting in *Myh3<sup>fl3-7/+</sup>* mice was verified by PCR across the LoxP site; animal numbers 1, 3 and 4 show two bands, with the larger molecular weight band resulting from incorporation of the LoxP site and the smaller molecular weight band from the wild type homologous chromosome, with animals 2 and 5 being wild type. (B) 3' LoxP targeting in *Myh3<sup>fl3-7/+</sup>* mice was verified by PCR for Neomycin cassette, which is part of the 3' targeted locus, in the same 5 animals tested in A for 5' LoxP targeting; animal numbers 1, 3 and 4 are positive for Neomycin while 2 and 5 are negative. (C) Deletion of *Myh3* exons 3-7 in the *Myh3<sup>Δ/+</sup>* animals was verified by PCR with 3 primers, 2 amplifying across the deleted region to give a product and the third primer giving a product in cases where there is no deletion. Results show that animals 1 and 5 have the deletion (smaller molecular weight deleted band and larger molecular weight wild type band as these are heterozygotes), while animals 2, 3 and 4 are wild type (single larger molecular weight band).

Figure S2

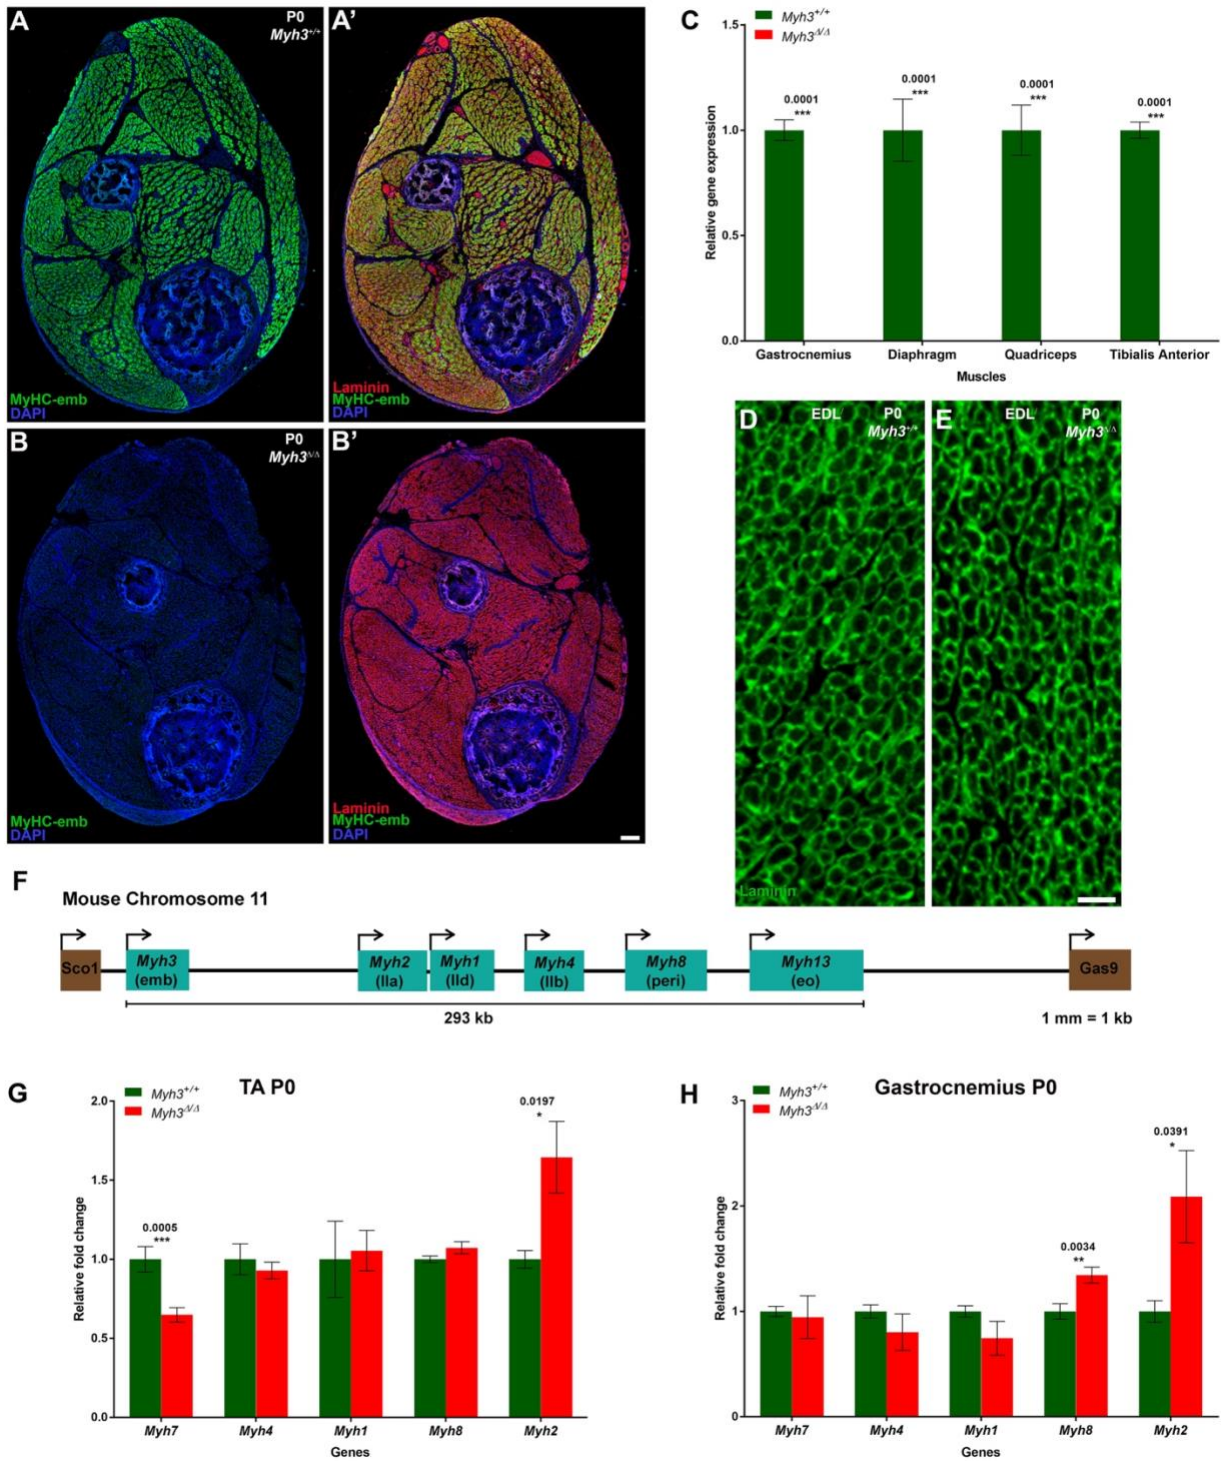

**Fig. S2: Validation of *Myh3* knockout.** (A-B') Cross sections through hind limbs of P0 *Myh3<sup>+/+</sup>* (A, A') and *Myh3<sup>Δ/Δ</sup>* (B, B') mice labeled by immunofluorescence for Laminin (red), MyHC-emb (green), and

DAPI (Blue). (C) Quantitation of *Myh3* transcript levels by qPCR in P0 gastrocnemius, tibialis anterior, quadriceps and diaphragm muscles of *Myh3<sup>+/+</sup>* and *Myh3<sup>Δ/Δ</sup>* mice. (D-E) Laminin (green) labeling through the EDL muscles of P0 *Myh3<sup>+/+</sup>* (D) and *Myh3<sup>Δ/Δ</sup>* (E) mice. (F) Schematic showing the *Myh* gene cluster on mouse chromosome 11 which is ~293 kb in size, where *Myh3* is followed by *Myh2*, *Myh1*, *Myh4*, *Myh8* and *Myh13*. (G-H) Quantitation of transcript levels of other *Myh* isoforms by qPCR in the P0 TA (G) and gastrocnemius (H) muscles of *Myh3<sup>+/+</sup>* and *Myh3<sup>Δ/Δ</sup>* mice. The graphical data represent the mean ±SEM of a minimum of 3 independent experiments. (Scale bar in B' is 100 microns and E is 20 microns).

Figure S3

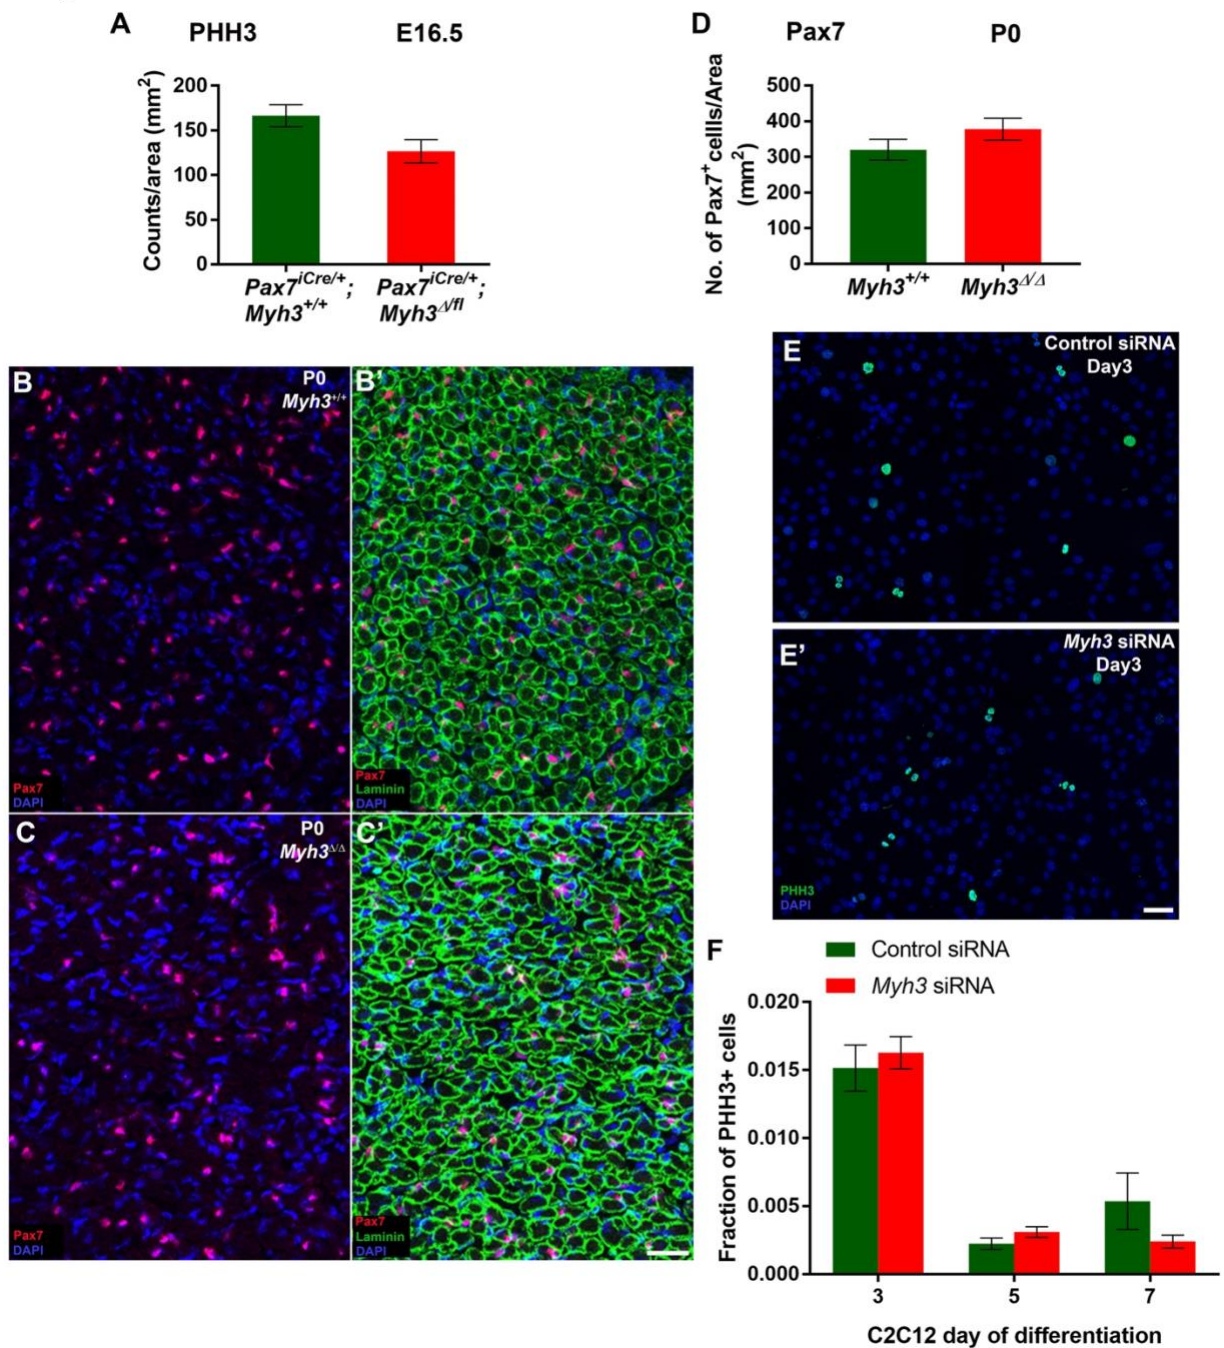

**Fig. S3: Loss of MyHC-emb function does not affect cell proliferation.** (A) Quantification of phospho-histone H3<sup>+</sup> cells at E16.5 in *Pax7<sup>iCre/+</sup>;Myh3<sup>Δfl/3-7</sup>* and control hind limbs normalized to total area. (B-C') Pax7 (red), Laminin (green) and DAPI (blue) immunofluorescence on *Myh3<sup>+/+</sup>* (B-B') and *Myh3<sup>ΔΔ</sup>* (C-C') knockout P0 hind limb sections. (D) Quantification of Pax7<sup>+</sup> cell number normalized to total area in P0 *Myh3<sup>+/+</sup>* and *Myh3<sup>ΔΔ</sup>* hind limb sections. (E-E') Representative images of control siRNA (E) and *Myh3* siRNA (E') treated C2C12 cells labeled for PHH3 (green) and DAPI (blue) at day 3 of differentiation. (F)

Quantification of PHH3<sup>+</sup> cells in control and *Myh3* siRNA treated C2C12 cells at days 3, 5 and 7 of differentiation. The graphical data represent the mean  $\pm$ SEM of a minimum of 3 independent experiments. (Scale bar in C' is 40 microns and E' is 50 microns).

Figure S4

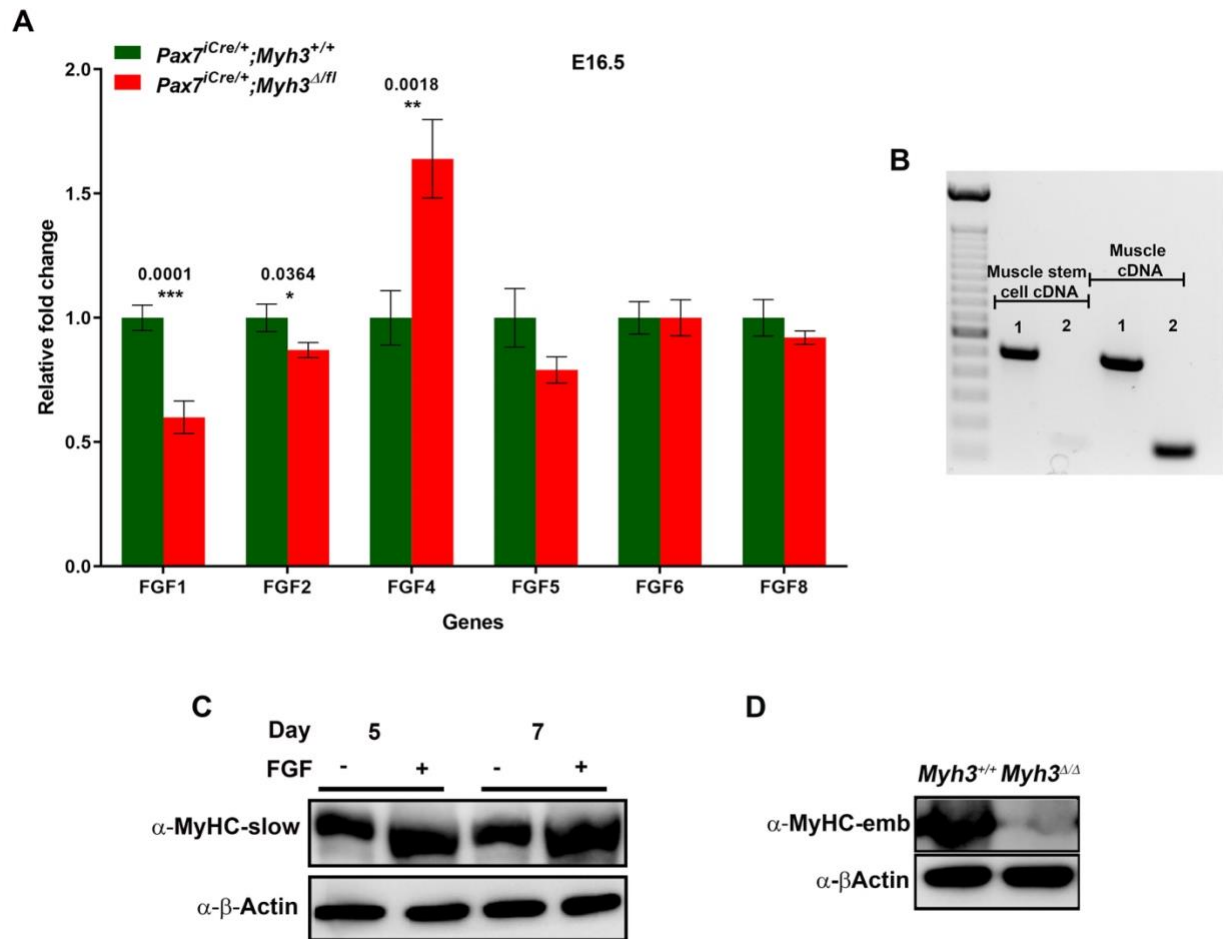

**Fig. S4: FGF levels are misregulated upon loss of MyHC-emb function and FGF supplementation promotes differentiation.** (A) Quantitation of transcript levels of FGFs known to bind FGFR4 by qPCR in E16.5 limb muscles of *Pax7<sup>iCre/+</sup>;Myh3<sup>+/+</sup>* and *Pax7<sup>iCre/+</sup>;Myh3<sup>Δ/fl</sup>* embryos. (B) MyHC-emb transcripts are not detectable in muscle stem cell cDNA as opposed to muscle cDNA by semi-quantitative RT-PCR; 1 denotes positive control (GAPDH) and 2 denotes *Myh3* PCR. (C) Western blots for MyHC-slow and beta-actin on *Myh3* siRNA treated C2C12 cells at days 5 and 7 of differentiation, grown in the presence or absence of FGF, with ‘-’ and ‘+’ denoting absence or presence of FGF in the media. (D) Western blots for MyHC-emb, and beta-actin from E16.5 *Myh3<sup>+/+</sup>* and *Myh3<sup>Δ/Δ</sup>* embryo heart protein lysates. The graphical data represent the mean  $\pm$ SEM of a minimum of 3 independent experiments.

Figure S5

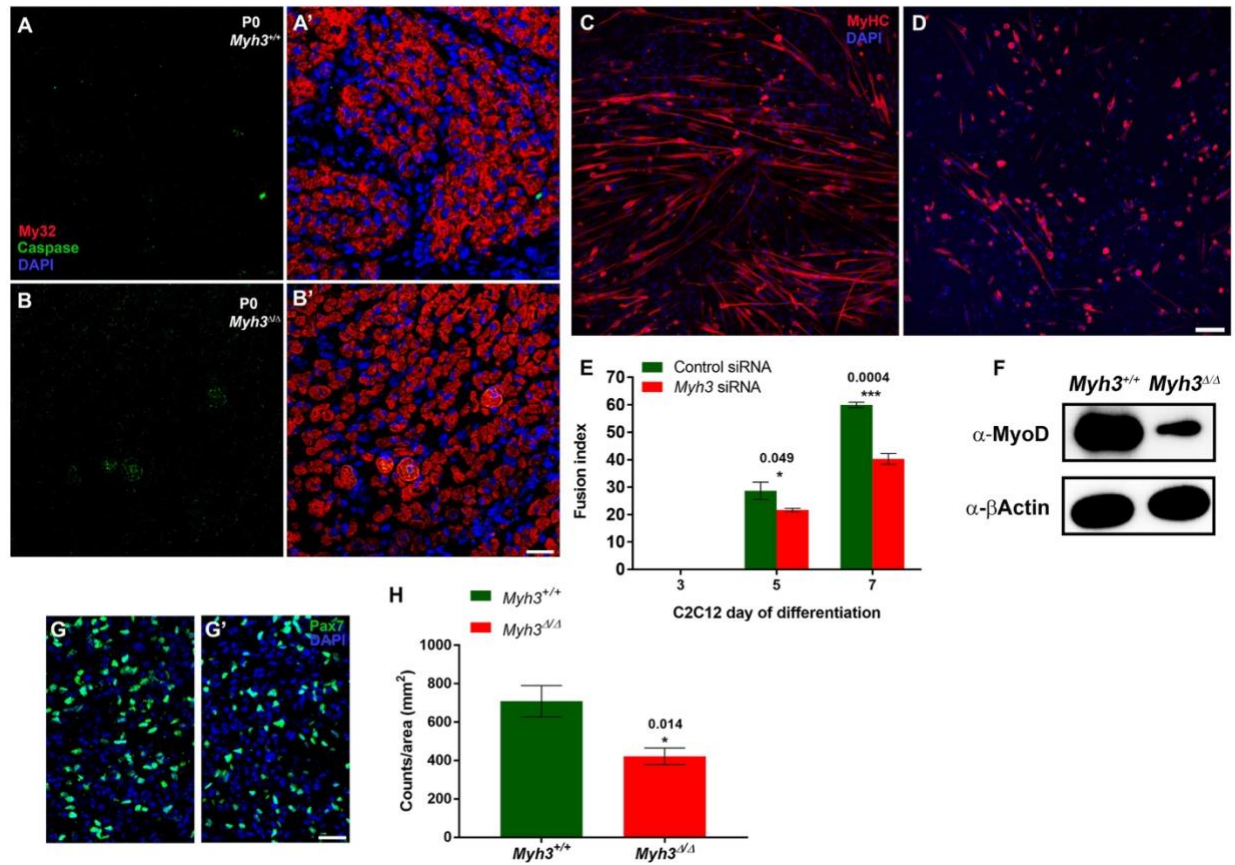

**Fig. S5: *Myh3* null mice exhibit increased cell death, reduced fusion index and reduction in muscle progenitors.** (A-B') Immunofluorescence for My32 (red), Caspase 3 (green), and DAPI (blue) on P0 *Myh3*<sup>+/+</sup> (A-A') and *Myh3*<sup>-/-</sup> (B-B') embryo hind limb cross sections; the left panels show Caspase 3 (A, B) and the right panels are the merge (A', B'). (C-D) Representative immunofluorescence images for MyHC (red) and DAPI (blue) on primary myoblasts, isolated from *Myh3*<sup>+/+</sup> (C) and *Myh3*<sup>-/-</sup> (D) P0 mice, differentiated for 7 days, for which fusion index is shown in Figure 5K. (E) Fusion index of control and *Myh3* siRNA treated C2C12 cells at days 3, 5 and 7 of differentiation. (F) Western blots for MyoD, and beta-actin from E16.5 *Myh3*<sup>+/+</sup> and *Myh3*<sup>-/-</sup> embryo hind limb protein lysates. (G-G') Immunofluorescence for Pax7 (green), and DAPI (blue) on cross sections through E16.5 *Myh3*<sup>+/+</sup> (G) and *Myh3*<sup>-/-</sup> (G') embryo hind limbs. (H) Quantification of Pax7<sup>+</sup> cell number normalized to total area in E16.5 *Myh3*<sup>+/+</sup> and *Myh3*<sup>-/-</sup> hind limb sections. The graphical data represent the mean  $\pm$ SEM of a minimum of 3 independent experiments. (Scale bar in B' is 20 microns, D is 100 microns and G' is 25 microns respectively).

Table S1: List of primers

| Gene                                      | Direction | Primer sequence 5' to 3'  | location | Product size (bp) using cDNA template |
|-------------------------------------------|-----------|---------------------------|----------|---------------------------------------|
| <b>Primers used for qPCR analysis</b>     |           |                           |          |                                       |
| <i>Myh1</i> (MyHCIIx)                     | Forward   | CGGTGGTGGAAAGAAAGG        | Exon17   | 154bp                                 |
|                                           | Reverse   | CAGGAGTCTTGGTTTCATT       | Exon18   |                                       |
| <i>Myh2</i> (MyHCIIa)                     | Forward   | CCAAGAAAGGTGCCAAGAAG      | Exon17   | 147bp                                 |
|                                           | Reverse   | CGGGAGTCTTGGTTTCATTG      | Exon18   |                                       |
| <i>Myh3</i> (MyHCemb)                     | Forward   | ATGAGTAGCGACACCGAGATG     | Exon3    | 117bp                                 |
|                                           | Reverse   | AAAGCAGTAGGTTTTGGCAT      | Exon3    |                                       |
| <i>Myh4</i> (MyHCIIb)                     | Forward   | GCTTGAAAACGAGGTGGAAA      | Exon40   | 190bp                                 |
|                                           | Reverse   | CCTCCTCAGCCTGTCTCTTG      | Exon41   |                                       |
| <i>Myh7</i> (MyHCslow)                    | Forward   | AGGGCGACCTCAACGAGAT       | Exon32   | 92bp                                  |
|                                           | Reverse   | CAGCAGACTCTGGAGGCTCTT     | Exon32   |                                       |
| <i>Myh8</i> (MyHC-peri)                   | Forward   | AACAGAAACGCAATGCTGAGG     | Exon38   | 135bp                                 |
|                                           | Reverse   | TCGCCTGTAATTTGTCCACCA     | Exon39   |                                       |
| MyoD                                      | Forward   | GCTGCCTTCTACGCACCTG       | Exon1    | 119bp                                 |
|                                           | Reverse   | GCCGCTGTAATCCATCATGC      | Exon2    |                                       |
| Myogenin                                  | Forward   | CAGTACATTGAGCGCCTACAG     | Exon1    | 163bp                                 |
|                                           | Reverse   | GGACCGAACTCCAGTGCAT       | Exon2    |                                       |
| Myf5                                      | Forward   | CCTGTCTGGTCCCGAAAGAAC     | Exon2    | 130bp                                 |
|                                           | Reverse   | GACGTGATCCGATCCACAATG     | Exon3    |                                       |
| Mrf4                                      | Forward   | ATCAGCTACATTGAGCGTCTACA   | Exon1    | 173bp                                 |
|                                           | Reverse   | CCTGGAATGATCCGAAACACTTG   | Exon2    |                                       |
| Pax7                                      | Forward   | TGTTGGGCTCTTCAAGGTCT      | Exon9    | 130bp                                 |
|                                           | Reverse   | GGAATGTGGAGGAGGATGC       | Exon9    |                                       |
| GAPDH                                     | Forward   | GACTTCAACAGCAACTCCCACT    | Exon6    | 169bp                                 |
|                                           | Reverse   | GGTCCAGGGTTTCTTACTCC      | Exon7    |                                       |
| Fgf1                                      | Forward   | GTAGTTTCCTAGAGGCAGGTTG    |          |                                       |
|                                           | Reverse   | TGATAAAGTGGAGTGAAGAGAGC   |          |                                       |
| Fgf2                                      | Forward   | GAAACACTCTTCTGTAACACACTT  |          |                                       |
|                                           | Reverse   | GTCAAACACTACAACCTCCAAGCAG |          |                                       |
| Fgf4                                      | Forward   | ACTCGTCGGTAAAGAAAGGC      |          |                                       |
|                                           | Reverse   | GACACGAGGGACAGTCTTC       |          |                                       |
| Fgf5                                      | Forward   | AACTCCTCGTATTCCTACAATCC   |          |                                       |
|                                           | Reverse   | CGGATGGCAAAGTCAATGG       |          |                                       |
| Fgf6                                      | Forward   | CTGTACACAACGCCAGCTT       |          |                                       |
|                                           | Reverse   | TTGTTTGGAAAGGAGGGTTTCTC   |          |                                       |
| Fgf8                                      | Forward   | CATGGCAGAAGACGGAGAC       |          |                                       |
|                                           | Reverse   | ACTCGGACTCTGCTTCCAAA      |          |                                       |
| <b>Primers used for RNaseq validation</b> |           |                           |          |                                       |
| Tpm3                                      | Forward   | CCCTGAGCCCAAACCTTAT       | Exon9    | 173bp                                 |
|                                           | Reverse   | GGCGATGAGATGATGTTC        | Exon9    |                                       |
| Ppargc1a                                  | Forward   | TCACACCAAACCCACAGAAA      | Exon5    | 127bp                                 |
|                                           | Reverse   | GGTCAGAGGAAGAGATAAAG      | Exon6    |                                       |



Table S1: List of primers

|                                    |                               |                                                                     |                             |                         |
|------------------------------------|-------------------------------|---------------------------------------------------------------------|-----------------------------|-------------------------|
| Lpin1                              | Forward<br>Reverse            | CAAACAAGCCAGTGACAACG<br>AGGGAGATGGCGATGGAT                          | Exon10<br>Exon10            | 132bp                   |
| Ankrd2                             | Forward<br>Reverse            | CATTTTCTTTCCCTGGGCTTGG<br>TTCTGCTCTGATTCTGGCTCGG                    | Exon7<br>Exon9              | 230bp                   |
| Myl2                               | Forward<br>Reverse            | GTCCACATCATTACCCACGG<br>AGAGCCAAGACTTCCTG                           | Exon7<br>Exon7              | 118bp                   |
| Adamts15                           | Forward<br>Reverse            | GAGACACAACCCAAACAAGT<br>CCTCGCAGTATTTCCACCG                         | Exon4<br>Exon5              | 152bp                   |
| Cebpb                              | Forward<br>Reverse            | CGGGTTTCGGGACTTGATGC<br>ACCCCGCAGGAACATCTTTA                        | Exon1<br>Exon1              | 127bp                   |
| Csrp3                              | Forward<br>Reverse            | ACCACAAGCAACCCTTCCAAAT<br>GTGTAAGCCCTCCAAACCCAAT                    | Exon4<br>Exon6              | 255bp                   |
| Btg2                               | Forward<br>Reverse            | GCTGCTTTGTATGGGTGGAT<br>AAAATGGGGAAGGTTGCTCT                        | Exon2<br>Exon2              | 231bp                   |
| Myl3                               | Forward<br>Reverse            | CGGGAAGGAGTGGTTCGGAC<br>AAAGGCAAGCACAGGTAGGT                        | Exon7<br>Exon7              | 104bp                   |
| Trim63                             | Forward<br>Reverse            | GGTGCCTACTTGCTCCTTGT<br>ATTCCTTGGTCACTCTGC                          | Exon3<br>Exon5              | 190bp                   |
| Pde4d                              | Forward<br>Reverse            | GCTTTGGAGGCTGTGTTC<br>CGAGTCCGAGTTTGTATTG                           | Exon13<br>Exon14            | 121bp                   |
| <b>Primers used for Genotyping</b> |                               |                                                                     |                             |                         |
| <i>Myh3</i>                        | Forward<br>Reverse<br>Reverse | CGTCTGAGAGGCTTCCATTC<br>TAGGTTTTGGCATCAAAGGG<br>TATCCTTCACGCTCTCCAC | Wildtype<br>Floxed<br>Delta | 231bp<br>279bp<br>179bp |

**Table S2. Antibodies used for immunofluorescence and western blots**

| Antibody                            | Type              | Source                               | Product No.          | Working Concentration (ug/ml) | Antigen retrieval for tissue sections |
|-------------------------------------|-------------------|--------------------------------------|----------------------|-------------------------------|---------------------------------------|
| <b>Primary antibodies</b>           |                   |                                      |                      |                               |                                       |
| Pax7                                | Mouse IgG1        | Developmental Studies Hybridoma Bank | PAX7                 | 2.4                           | Yes                                   |
| MyHCemb                             | Mouse IgG1        | Developmental Studies Hybridoma Bank | F1.652               | 3                             | Yes                                   |
| MyHCslow                            | Mouse IgG1        | Sigma                                | M8421 (NOQ7.5.4D)    | 1.5 (IF), 6 (western)         | Yes                                   |
| MyHCfast                            | Mouse IgG1        | Sigma                                | M4276 (MY-32)        | 10                            | Yes                                   |
| MyoD                                | Mouse IgG1        | Santa Cruz Biotechnology             | sc-32758 (5.8A)      | 4 (IF), 2 (western)           | Yes                                   |
| MyoG                                | Mouse IgG1        | Santa Cruz Biotechnology             | sc-12732 (F5D)       | 2                             | Western only                          |
| Myf5                                | Rabbit polyclonal | Santa Cruz Biotechnology             | sc-302 (C-20)        | 1                             | Western only                          |
| Caspase 3                           | Rabbit IgG        | Cell Signaling Technology            | 9664 (Asp175) (5A1E) | 0.02                          | No                                    |
| Phospho-Histone H3                  | Rabbit IgG        | Thermo Fisher Scientific             | PA5-17869 (Ser10)    | 0.29                          | Yes                                   |
| $\beta$ -Actin                      | Mouse IgG2b       | Cell Signaling Technology            | 3700 (810D10)        | 1.25                          | Western only                          |
| Laminin                             | Rabbit polyclonal | Sigma                                | L9393                | 2.5                           | Yes                                   |
| Phospho-p42/44 MAPK (Thr202/Tyr204) | Rabbit IgG        | Cell Signaling Technology            | 4370                 | 0.01                          | Western only                          |
| Phospho-p38 MAPK (Thr180/Tyr182)    | Rabbit IgG        | Cell Signaling Technology            | 4511                 | 0.02                          | Western only                          |
| Phospho-Akt (Ser473)                | Rabbit IgG        | Cell Signaling Technology            | 4060                 | 0.02                          | Western only                          |
| Phospho-Stat3 (Tyr705)              | Mouse IgG1        | Cell Signaling Technology            | 4113                 | 0.01                          | Western only                          |

| <b>Secondary antibodies, fluorescent coupled conjugates</b> |      |                                     |                          |              |              |
|-------------------------------------------------------------|------|-------------------------------------|--------------------------|--------------|--------------|
| Cy2/Cy3 conjugated Goat anti-mouse                          | Goat | Jackson ImmunoResearch Laboratories | 115-225-146/ 115-165-146 | 7.5          | IF only      |
| Cy2/Cy3 conjugated Goat anti-rabbit                         | Goat | Jackson ImmunoResearch Laboratories | 111-225-144/ 111-165-144 | 7.5          | IF only      |
| Biotin conjugated Goat anti-mouse                           | Goat | Jackson ImmunoResearch Laboratories | 115-065-020              | 2.8          | IF only      |
| Biotin conjugated Goat anti-rabbit                          | Goat | Jackson ImmunoResearch Laboratories | 111-065-144              | 2.8          | IF only      |
| Cy2 conjugated streptavidin                                 | -    | Jackson ImmunoResearch Laboratories | 016-220-084              | 3.6          | IF only      |
| Cy3 conjugated streptavidin                                 | -    | Jackson ImmunoResearch Laboratories | 016-160-084              | 3.6          | IF only      |
| Oregon Green 488 Phalloidin                                 | -    | Life Technologies                   | O7466                    | 0.6 Units/ml | IF only      |
| Peroxidase-AffiniPure Goat anti-rabbit                      | Goat | Jackson ImmunoResearch Laboratories | 111-035-144              | 0.08         | Western only |
| Peroxidase-AffiniPure Goat anti-mouse                       | Goat | Jackson ImmunoResearch Laboratories | 111-035-003              | 0.08         | Western only |

**Table S3: List of RNAseq selected genes and their log2fold change values in Diaphragm, Gastrocnemius, Quadriceps and TA muscles.** Only genes with statistically significant log2 fold change values are shown.

| Genes                                                                                          | Gene Symbol   | Diaphragm | Gastrocnemius | Quadriceps | Tibialis anterior |
|------------------------------------------------------------------------------------------------|---------------|-----------|---------------|------------|-------------------|
| B cell translocation gene 2, anti-proliferative                                                | Btg2          | 0.77      | 0.47          | 0.63       | 0.41              |
| Nuclear factor, interleukin 3, regulated                                                       | Nfil3         | 0.51      | 0.38          | 0.48       | 0.47              |
| Cysteine and glycine-rich protein 3                                                            | Csrp3         | 0.76      | 0.67          | 0.71       | -                 |
| Tribbles homolog 1 (Drosophila)                                                                | Trib1         | 0.56      | 0.50          | 0.47       | -                 |
| Phosphodiesterase 4D, cAMP specific                                                            | Pde4d         | 0.56      | -             | 0.55       | 0.69              |
| CCR4 carbon catabolite repression 4-like ( <i>S. cerevisiae</i> )                              | Ccrn4l        | 0.53      | -             | 0.52       | 0.45              |
| Cell adhesion molecule 3                                                                       | Cadm3         | -         | -0.55         | -0.43      | -0.39             |
| CCAAT/enhancer binding protein (C/EBP), beta                                                   | Cebpb         | -         | 0.63          | 0.56       | 0.50              |
| Myosin, light polypeptide 3                                                                    | Myl3          | -         | -0.46         | -0.68      | -0.66             |
| Calmodulin binding transcription activator 1                                                   | Camta1        | -         | 0.44          | 0.38       | 0.38              |
| Early B cell factor 2                                                                          | Ebf2          | -         | -0.30         | -0.31      | -0.36             |
| Solute carrier family 2 (facilitated glucose transporter), member 1                            | Slc2a1        | -         | 0.53          | 0.57       | 0.66              |
| RIKEN cDNA C130074G19 gene                                                                     | C130074G19Rik | -         | -0.31         | -0.33      | -0.26             |
| Peroxisome proliferative activated receptor, gamma, coactivator 1 alpha                        | Ppargc1a      | -         | 0.42          | 0.58       | 0.52              |
| Tripartite motif-containing 63                                                                 | Trim63        | -         | 0.45          | 0.69       | 0.55              |
| Tropomyosin 3, gamma                                                                           | Tpm3          | -         | -0.34         | -0.47      | -0.41             |
| Family with sequence similarity 107, member A                                                  | Fam107a       | -         | 0.48          | 0.52       | 0.69              |
| a disintegrin-like and metallopeptidase (reprolysin type) with thrombospondin type 1 motif, 15 | Adamts15      | -         | 0.34          | 0.55       | 0.43              |
| Lipin 1                                                                                        | Lpin1         | -         | 0.46          | 0.59       | 0.75              |
| a disintegrin-like and metallopeptidase (reprolysin type) with thrombospondin type 1 motif, 1  | Adamts1       | -         | 0.31          | 0.40       | 0.29              |
| Ankyrin repeat domain 2 (stretch responsive muscle)                                            | Ankrd2        | 1.01      | 0.61          | -          | -                 |

|                                                                          |         |      |       |       |      |
|--------------------------------------------------------------------------|---------|------|-------|-------|------|
| ST3 beta-galactoside alpha-2,3-sialyltransferase 5                       | St3gal5 | 0.42 | 0.54  | -     | -    |
| Uridine-cytidine kinase 2                                                | Uck2    | 0.31 | 0.35  | -     | -    |
| Ankyrin repeat domain 1 (cardiac muscle)                                 | Ankrd1  | 0.54 | 0.54  | -     | -    |
| v-maf musculoaponeurotic fibrosarcoma oncogene family, protein F (avian) | Maff    | 0.63 | -     | 0.48  | -    |
| salt inducible kinase 1                                                  | Sik1    | 0.54 | -     | 0.39  | -    |
| xin actin-binding repeat containing 2                                    | Xirp2   | -    | 0.87  | 0.48  | -    |
| shisa family member 3                                                    | Shisa3  | -    | 0.74  | 0.74  | -    |
| collagen, type XXII, alpha 1                                             | Col22a1 | -    | 0.53  | 0.35  | -    |
| regulator of cell cycle                                                  | Rgcc    | -    | 0.67  | 0.46  | -    |
| heat shock protein family, member 7 (cardiovascular)                     | Hspb7   | -    | 0.63  | 0.45  | -    |
| major facilitator superfamily domain containing 2A                       | Mfsd2a  | -    | 0.72  | 0.48  | -    |
| peptidase inhibitor 16                                                   | Pi16    | -    | -0.42 | -0.46 | -    |
| family with sequence similarity 214, member B                            | Fam214b | -    | 0.48  | 0.40  | -    |
| stathmin-like 4                                                          | Stmn4   | -    | 0.59  | 0.46  | -    |
| ATP-binding cassette, sub-family B (MDR/TAP), member 4                   | Abcb4   | -    | 0.56  | 0.46  | -    |
| BarH-like homeobox 2                                                     | Barx2   | -    | -0.49 | -0.54 | -    |
| progesterin and adipoQ receptor family member VIII                       | Paqr8   | -    | 0.53  | 0.55  | -    |
| dual specificity phosphatase 5                                           | Dusp5   | -    | 0.53  | 0.59  | -    |
| musculoskeletal, embryonic nuclear protein 1                             | Mustn1  | -    | 0.42  | 0.47  | -    |
| solute carrier family 35, member F5                                      | Slc35f5 | -    | 0.39  | 0.41  | -    |
| BCL2-associated athanogene 3                                             | Bag3    | -    | 0.29  | 0.31  | -    |
| G protein-coupled receptor 133                                           | Gpr133  | -    | -0.37 | -0.45 | -    |
| meningioma 1                                                             | Mn1     | -    | 0.48  | -     | 0.67 |
| solute carrier family 43, member 2                                       | Slc43a2 | -    | 0.44  | -     | 0.40 |
| hypoxia inducible factor 3, alpha subunit                                | Hif3a   | -    | 0.49  | -     | 0.49 |

|                                                                                |               |      |      |       |       |
|--------------------------------------------------------------------------------|---------------|------|------|-------|-------|
| maestro heat-like repeat family member 1                                       | Mroh1         | -    | 0.33 | -     | 0.43  |
| ankyrin repeat and SOCS box-containing 2                                       | Asb2          | -    | 0.29 | -     | 0.32  |
| nuclear receptor subfamily 4, group A, member 1                                | Nr4a1         | -    | 0.49 | -     | 0.46  |
| ankyrin repeat and zinc finger domain containing 1                             | Ankzf1        | -    | 0.37 | -     | 0.43  |
| ubiquitin specific peptidase 2                                                 | Usp2          | -    | -    | 0.28  | 0.34  |
| solute carrier family 15, member 4                                             | Slc15a4       | -    | -    | 0.39  | 0.38  |
| transmembrane protein 37                                                       | Tmem37        | -    | -    | 0.46  | 0.46  |
| solute carrier family 7 (cationic amino acid transporter, y+ system), member 8 | Slc7a8        | -    | -    | 0.39  | 0.37  |
| cytochrome b-561 domain containing 1                                           | Cyb561d1      | -    | -    | -0.46 | -0.58 |
| kelch-like 38                                                                  | Klhl38        | -    | -    | 0.53  | 0.74  |
| carbonic anhydrase 3                                                           | Car3          | -    | -    | -0.38 | -0.57 |
| galactosidase, beta 1-like 2                                                   | Glb1l2        | -    | -    | 0.54  | 0.47  |
| solute carrier family 25 (mitochondrial carrier, phosphate carrier), member 25 | Slc25a25      | -    | -    | 0.51  | 0.54  |
| deiodinase, iodothyronine, type II                                             | Dio2          | -    | -    | 0.56  | 0.54  |
| RIKEN cDNA 2410131K14 gene                                                     | 2410131K14Rik | -    | -    | 0.45  | 0.34  |
| myosin, light polypeptide 2, regulatory, cardiac, slow                         | Myl2          | -    | -    | -0.77 | -1.21 |
| pyridoxal (pyridoxine, vitamin B6) kinase                                      | Pdxk          | 0.47 | -    | -     | -     |
| heat shock 105kDa/110kDa protein 1                                             | Hsph1         | 0.37 | -    | -     | -     |
| ATPase, class II, type 9A                                                      | Atp9a         | 0.42 | -    | -     | -     |
| TCDD-inducible poly(ADP-ribose) polymerase                                     | Tiparp        | 0.54 | -    | -     | -     |
| chemokine (C-C motif) ligand 21A (serine)                                      | Ccl21a        | 0.54 | -    | -     | -     |
| ADAMTS-like 2                                                                  | Adamtsl2      | 0.53 | -    | -     | -     |
| serum/glucocorticoid regulated kinase 1                                        | Sgk1          | 0.45 | -    | -     | -     |
| ADP-ribosylation factor-like 4D                                                | Arl4d         | 0.59 | -    | -     | -     |

|                                                                                |               |      |       |   |   |
|--------------------------------------------------------------------------------|---------------|------|-------|---|---|
| sodium channel, voltage-gated, type V, alpha                                   | Scn5a         | 0.42 | -     | - | - |
| family with sequence similarity 220, member A                                  | Fam220a       | 0.33 | -     | - | - |
| keratocan                                                                      | Kera          | 0.51 | -     | - | - |
| OTU deubiquitinase with linear linkage specificity                             | Otulin        | 0.36 | -     | - | - |
| atonal homolog 8 (Drosophila)                                                  | Atoh8         | 0.49 | -     | - | - |
| RIKEN cDNA 6030419C18 gene                                                     | 6030419C18Rik | 0.44 | -     | - | - |
| phosphodiesterase 4B, cAMP specific                                            | Pde4b         | 0.49 | -     | - | - |
| NA                                                                             | NA            | 0.35 | -     | - | - |
| myosin binding protein C, cardiac                                              | Mybpc3        | -    | 0.66  | - | - |
| microtubule-associated protein tau                                             | Mapt          | -    | 0.74  | - | - |
| carboxylesterase 5A                                                            | Ces5a         | -    | 0.80  | - | - |
| epidermal growth factor-containing fibulin-like extracellular matrix protein 1 | Efemp1        | -    | -0.58 | - | - |
| myosin, heavy polypeptide 2, skeletal muscle, adult                            | Myh2          | -    | 0.76  | - | - |
| tripartite motif-containing 9                                                  | Trim9         | -    | 0.72  | - | - |
| T cell lymphoma invasion and metastasis 2                                      | Tiam2         | -    | 0.59  | - | - |
| ubiquitin carboxy-terminal hydrolase L1                                        | Uchl1         | -    | 0.45  | - | - |
| calmodulin-like 3                                                              | Calml3        | -    | 0.59  | - | - |
| microtubule associated tumor suppressor candidate 2                            | Mtus2         | -    | 0.60  | - | - |
| runt related transcription factor 2                                            | Runx2         | -    | 0.60  | - | - |
| methyltransferase like 21C                                                     | Mettl21c      | -    | 0.58  | - | - |
| family with sequence similarity 81, member A                                   | Fam81a        | -    | 0.56  | - | - |
| MAP/microtubule affinity-regulating kinase 1                                   | Mark1         | -    | -0.30 | - | - |
| proline synthetase co-transcribed                                              | Prosc         | -    | 0.26  | - | - |

|                                                                   |         |   |       |   |   |
|-------------------------------------------------------------------|---------|---|-------|---|---|
| secreted frizzled-related protein 4                               | Sfrp4   | - | -0.57 | - | - |
| tenascin N                                                        | Tnn     | - | 0.57  | - | - |
| connector enhancer of kinase suppressor of Ras 1                  | Cnksr1  | - | 0.56  | - | - |
| DnaJ (Hsp40) homolog, subfamily B, member 2                       | Dnajb2  | - | 0.42  | - | - |
| myoglobin                                                         | Mb      | - | 0.40  | - | - |
| immunoglobulin superfamily, member 21                             | Igsf21  | - | 0.47  | - | - |
| dachshund 1 (Drosophila)                                          | Dach1   | - | -0.38 | - | - |
| transmembrane protein 125                                         | Tmem125 | - | 0.45  | - | - |
| chondroitin sulfate proteoglycan 4                                | Cspg4   | - | 0.43  | - | - |
| calcium/calmodulin-dependent protein kinase I gamma               | Camk1g  | - | 0.52  | - | - |
| solute carrier family 6 (neurotransmitter transporter), member 18 | Slc6a18 | - | 0.52  | - | - |
| myelocytomatosis oncogene                                         | Myc     | - | 0.32  | - | - |
| tubby candidate gene                                              | Tub     | - | -0.49 | - | - |
| plasminogen activator, tissue                                     | Plat    | - | -0.27 | - | - |
| tetratricopeptide repeat domain 9                                 | Ttc9    | - | 0.38  | - | - |
| spleen focus forming virus (SFFV) proviral integration oncogene   | Spi1    | - | -0.43 | - | - |
| laminin, gamma 2                                                  | Lamc2   | - | 0.46  | - | - |
| splA/ryanodine receptor domain and SOCS box containing 2          | Spsb2   | - | 0.44  | - | - |
| regulator of G-protein signaling 5                                | Rgs5    | - | -0.31 | - | - |
| tetraspanin 18                                                    | Tspan18 | - | -0.29 | - | - |
| Mir17 host gene (non-protein coding)                              | Mir17hg | - | 0.36  | - | - |
| extracellular matrix protein 1                                    | Ecm1    | - | -0.37 | - | - |
| netrin 1                                                          | Ntn1    | - | -0.37 | - | - |
| WD40 repeat domain                                                | Wdr95   | - | 0.43  | - | - |



|                                                                                            |         |   |       |       |   |
|--------------------------------------------------------------------------------------------|---------|---|-------|-------|---|
| coagulation factor II (thrombin) receptor-like 3                                           | F2rl3   | - | -0.45 | -     | - |
| wingless-type MMTV integration site family, member 10B                                     | Wnt10b  | - | -0.46 | -     | - |
| melanophilin                                                                               | Mlph    | - | 0.42  | -     | - |
| Fras1 related extracellular matrix protein 1                                               | Frem1   | - | 0.31  | -     | - |
| RNA, 7SK, nuclear                                                                          | Rn7sk   | - | 0.42  | -     | - |
| vacuolar protein sorting 37B (yeast)                                                       | Vps37b  | - | -0.26 | -     | - |
| sodium channel, voltage-gated, type III, alpha                                             | Scn3a   | - | 0.40  | -     | - |
| C1q and tumor necrosis factor related protein 2                                            | C1qtnf2 | - | -0.39 | -     | - |
| CD34 antigen                                                                               | Cd34    | - | -0.15 | -     | - |
| family with sequence similarity 174, member B                                              | Fam174b | - | -0.36 | -     | - |
| FAD-dependent oxidoreductase domain containing 2                                           | Foxred2 | - | -     | 0.61  | - |
| ring finger protein 144B                                                                   | Rnf144b | - | -     | 0.38  | - |
| gap junction protein, delta 4                                                              | Gjd4    | - | -     | 0.39  | - |
| angiotensinogen (serpin peptidase inhibitor, clade A, member 8)                            | Agt     | - | -     | 0.47  | - |
| dynamamin 3, opposite strand                                                               | Dnm3os  | - | -     | 0.23  | - |
| solute carrier family 3 (activators of dibasic and neutral amino acid transport), member 2 | Slc3a2  | - | -     | 0.26  | - |
| TSC22 domain family, member 1                                                              | Tsc22d1 | - | -     | 0.39  | - |
| homeobox C8                                                                                | Hoxc8   | - | -     | -0.39 | - |
| NA                                                                                         | NA      | - | -     | 0.46  | - |
| Solute carrier family 35, member E1                                                        | Slc35e1 | - | -     | 0.38  | - |
| NCK associated protein 1 like                                                              | Nckap11 | - | -     | 0.39  | - |

|                                                                                        |               |   |   |       |       |
|----------------------------------------------------------------------------------------|---------------|---|---|-------|-------|
| pleckstrin homology domain containing, family F (with FYVE domain) member 1            | Plekhf1       | - | - | 0.38  | -     |
| sema domain, transmembrane domain (TM), and cytoplasmic domain, (semaphorin) 6A        | Sema6a        | - | - | -0.19 | -     |
| growth associated protein 43                                                           | Gap43         | - | - | -0.41 | -     |
| kinesin family member 26A                                                              | Kif26a        | - | - | -0.29 | -     |
| carbonic anhydrase 14                                                                  | Car14         | - | - | 0.46  | -     |
| low density lipoprotein receptor-related protein 11                                    | Lrp11         | - | - | -0.46 | -     |
| R-spondin 3 homolog ( <i>Xenopus laevis</i> )                                          | Rspo3         | - | - | -0.35 | -     |
| RIKEN cDNA 2500002B13 gene                                                             | 2500002B13Rik | - | - | 0.43  | -     |
| twinfilin, actin-binding protein, homolog 2 ( <i>Drosophila</i> )                      | Twf2          | - | - | 0.25  | -     |
| sestrin 2                                                                              | Sesn2         | - | - | 0.43  | -     |
| troponin C, cardiac/slow skeletal                                                      | Tnnc1         | - | - | -     | -0.55 |
| melanin-concentrating hormone receptor 1                                               | Mchr1         | - | - | -     | 0.81  |
| phosphoserine aminotransferase 1                                                       | Psat1         | - | - | -     | -0.45 |
| myosin, light polypeptide kinase 2, skeletal muscle                                    | Mylk2         | - | - | -     | 0.57  |
| serine hydroxymethyltransferase 1 (soluble)                                            | Shmt1         | - | - | -     | 0.41  |
| sema domain, immunoglobulin domain (Ig), short basic domain, secreted, (semaphorin) 3C | Sema3c        | - | - | -     | -0.36 |
| SH2B adaptor protein 2                                                                 | Sh2b2         | - | - | -     | 0.48  |
| ankyrin repeat and SOCS box-containing 11                                              | Asb11         | - | - | -     | 0.53  |
| myosin, heavy polypeptide 7, cardiac muscle, beta                                      | Myh7          | - | - | -     | -0.43 |
| solute carrier family 2 (facilitated glucose transporter), member 4                    | Slc2a4        | - | - | -     | 0.42  |
| troponin T1, skeletal, slow                                                            | Tnnt1         | - | - | -     | -0.32 |
| family with sequence similarity 214, member A                                          | Fam214a       | - | - | -     | 0.43  |
| PHD finger protein 10                                                                  | Phf10         | - | - | -     | -0.28 |

|                                                                   |               |   |   |   |       |
|-------------------------------------------------------------------|---------------|---|---|---|-------|
| asparagine synthetase                                             | Asns          | - | - | - | -0.50 |
| F-box protein 31                                                  | Fbxo31        | - | - | - | 0.39  |
| cysteinyl-tRNA synthetase                                         | Cars          | - | - | - | -0.42 |
| tetraspanin 13                                                    | Tspan13       | - | - | - | -0.29 |
| adenosine monophosphate deaminase 3                               | Ampd3         | - | - | - | 0.56  |
| lysine (K)-specific demethylase 4B                                | Kdm4b         | - | - | - | 0.28  |
| patatin-like phospholipase domain containing 7                    | Pnpla7        | - | - | - | 0.47  |
| myosin VC                                                         | Myo5c         | - | - | - | 0.55  |
| pantothenate kinase 1                                             | Pank1         | - | - | - | 0.53  |
| dihydrolipoamide branched chain transacylase E2                   | Dbt           | - | - | - | 0.47  |
| nicotinamide phosphoribosyltransferase                            | Nampt         | - | - | - | 0.35  |
| DDB1 and CUL4 associated factor 11                                | Dcaf11        | - | - | - | 0.24  |
| potassium voltage gated channel, Shaw-related subfamily, member 4 | Kcnc4         | - | - | - | -0.48 |
| glycyl-tRNA synthetase                                            | Gars          | - | - | - | -0.36 |
| inscuteable homolog (Drosophila)                                  | Insc          | - | - | - | -0.53 |
| aldehyde dehydrogenase 18 family, member A1                       | Aldh18a1      | - | - | - | -0.42 |
| nitric oxide synthase 1, neuronal                                 | Nos1          | - | - | - | 0.50  |
| proteolipid protein (myelin) 1                                    | Plp1          | - | - | - | 0.32  |
| pyruvate dehydrogenase phosphatase catalytic subunit 2            | Pdp2          | - | - | - | 0.52  |
| myosin, light polypeptide 6B                                      | Myl6b         | - | - | - | -0.34 |
| ADP-ribosylhydrolase like 1                                       | Adprh1        | - | - | - | -0.32 |
| transport and golgi organization 2                                | Tango2        | - | - | - | 0.48  |
| ankyrin repeat and SOCS box-containing 14                         | Asb14         | - | - | - | 0.49  |
| glycoprotein galactosyltransferase alpha 1, 3                     | Ggta1         | - | - | - | 0.34  |
| protein phosphatase 1K (PP2C domain containing)                   | Ppm1k         | - | - | - | 0.51  |
| RIKEN cDNA 1110018N20 gene                                        | 1110018N20Rik | - | - | - | -0.47 |

|                                                                       |               |   |   |   |       |
|-----------------------------------------------------------------------|---------------|---|---|---|-------|
| corneodesmosin                                                        | Cdsn          | - | - | - | -0.49 |
| WD repeat domain 1                                                    | Wdr1          | - | - | - | -0.30 |
| Smith-Magenis syndrome chromosome region, candidate 8 homolog (human) | Smcr8         | - | - | - | 0.42  |
| Kruppel-like factor 15                                                | Klf15         | - | - | - | 0.50  |
| tyrosyl-tRNA synthetase                                               | Yars          | - | - | - | -0.32 |
| NA                                                                    | NA            | - | - | - | 0.49  |
| glutamate-ammonia ligase (glutamine synthetase)                       | Glul          | - | - | - | 0.45  |
| epithelial membrane protein 1                                         | Emp1          | - | - | - | -0.27 |
| methionine-tRNA synthetase                                            | Mars          | - | - | - | -0.34 |
| Rho GTPase activating protein 36                                      | Arhgap36      | - | - | - | -0.20 |
| mitochondrially encoded 12S rRNA                                      | mt-Rnr1       | - | - | - | 0.44  |
| ankyrin repeat and SOCS box-containing 10                             | Asb10         | - | - | - | 0.47  |
| transmembrane protein 52                                              | Tmem52        | - | - | - | 0.41  |
| exportin, tRNA (nuclear export receptor for tRNAs)                    | Xpot          | - | - | - | 0.29  |
| ankyrin repeat domain 9                                               | Ankrd9        | - | - | - | -0.26 |
| cystathionase (cystathionine gamma-lyase)                             | Cth           | - | - | - | 0.43  |
| host cell factor C1 regulator 1 (XPO1-dependent)                      | Hcfc1r1       | - | - | - | -0.23 |
| solute carrier family 44, member 2                                    | Slc44a2       | - | - | - | 0.22  |
| F-box protein 32                                                      | Fbxo32        | - | - | - | 0.44  |
| myosin, heavy polypeptide 3, skeletal muscle, embryonic               | Myh3          | - | - | - | -0.32 |
| tetratricopeptide repeat domain 38                                    | Ttc38         | - | - | - | 0.45  |
| myosin, light polypeptide 9, regulatory                               | Myl9          | - | - | - | -0.33 |
| zinc finger, FYVE domain containing 21                                | Zfyve21       | - | - | - | 0.35  |
| solute carrier family 25, member 38                                   | Slc25a38      | - | - | - | 0.38  |
| RIKEN cDNA 4933431E20 gene                                            | 4933431E20Rik | - | - | - | 0.37  |

|                                                  |          |   |   |   |       |
|--------------------------------------------------|----------|---|---|---|-------|
| SLIT and NTRK-like family, member 4              | Slitrk4  | - | - | - | -0.43 |
| peroxisome proliferator activated receptor alpha | Ppara    | - | - | - | 0.46  |
| paired related homeobox 1                        | Prrx1    | - | - | - | -0.22 |
| transmembrane protein 131                        | Tmem131  | - | - | - | 0.21  |
| phosphodiesterase 7A                             | Pde7a    | - | - | - | 0.33  |
| methyltransferase like 21E                       | Mettl21e | - | - | - | 0.46  |

**Table S4:** Table showing details of candidate genes common between MyHC-emb<sup>ΔΔ</sup> RNA-seq analysis and transcription factors regulating myogenesis found by Rajan et al (2012).

| Genes  | Rajan S et al (2012)  |                              |           | MyHC-emb <sup>ΔΔ</sup> RNA-seq                             |                                             |
|--------|-----------------------|------------------------------|-----------|------------------------------------------------------------|---------------------------------------------|
|        | Log Fold change       | Expression stage and effect  | Validated | Log2 fold change                                           | Muscles                                     |
| Nr4a1  | Max 3.29<br>Min -0.08 | Early upregulated            | yes       | 0.492792(G)<br>0.460666(TA)                                | Gastrocnemius and TA                        |
| Btg2   | Max 0.94<br>Min 0.00  | Early upregulated            | yes       | 0.774867(D)<br>0.473973 (G)<br>0.631396(Q)<br>0.412594(TA) | Diaphragm, Gastrocnemius, Quadriceps and TA |
| Ccrn41 | Max 1.52<br>Min 0.00  | Early upregulated            | No        | 0.537682(D)<br>0.525946(Q)<br>0.451526(TA)                 | Diaphragm, Quadriceps and TA                |
| Ankrd1 | Max 1.22<br>Min -0.14 | Early upregulated            | yes       | 0.542368 (D)<br>0.541384(G)                                | Diaphragm and Gastrocnemius                 |
| Maff   | Max 0.83<br>Min -0.06 | Early upregulated            | yes       | 0.631282(D)<br>0.484519(Q)                                 | Diaphragm and Quadriceps                    |
| Ankrd2 | Max 4.12<br>Min       | Late upregulated             | yes       | 1.016406(D)<br>0.616889(G)                                 | Diaphragm and Gastrocnemius                 |
| Cebpb  | Max 0<br>Min-0.09     | Late downregulated           | No        | 0.634893(G)<br>0.56011(Q)<br>0.509648(TA)                  | Gastrocnemius, Quadriceps and TA            |
| Asb2   | -                     | -                            | yes       | 0.298487(G)<br>0.326305(TA)                                | Gastrocnemius and TA                        |
| Myc    | Max 0.99<br>Min -0.22 | Early upregulated            | yes       | 0.321544(G)                                                | Gastrocnemius                               |
| Prrx1  | Max 0.00<br>Min -1.23 | Early and late downregulated | No        | -0.22888(TA)                                               | TA                                          |
| Hoxc8  | Max 0.00<br>Min -1.13 | Early downregulated          | No        | -0.39671 (Q)                                               | Quadriceps                                  |
| Runx2  | Max 0.03<br>Min -1.24 | Late downregulated           | No        | 0.60068(G)                                                 | Gastrocnemius                               |
